# Supplementary material
Source: PubMed Central journal article supplement (PMC4794076)
Supplement: andn025599.ww1_default.pdf [file andn025599.ww1_default.pdf]

## SUPPLEMENTAL MATERIAL

### eFIGURES

**eFigure:** Standardised differences between TNF- $\alpha$  inhibitor users and non-users before and after matching on fixed factors and propensity scores.

### eTABLES

**eTable 1:** All diagnoses of infections with related ICD 10-codes included as any serious infection with the subdivision into six site-specific groups.

**eTable 2:** Variables included in the propensity score and variables for inflammatory bowel disease-related drugs with diagnostic, operation and ATC codes, categories, source of data and missing values.

**eTable 3.** Characteristics of TNF- $\alpha$  inhibitor users and non-users before matching on propensity scores.

**eTable 4.** Characterisation of the distribution of the serious infection cases observed in TNF- $\alpha$  inhibitor users and non-users within 365 days of treatment initiation.

**eTable 5.** Characteristics of cohort patients with inflammatory bowel disease treated with TNF- $\alpha$  inhibitors and azathioprine as monotherapy, before and after matching on propensity scores.

**eTable 6:** Array approach testing the impact of unmeasured confounding

**eTable 7.** Hazard ratios for any serious infection comparing current and past TNF- $\alpha$  inhibitor users with non-users based on a propensity score matched sub-cohort.

**eTable 8:** Hazard ratios for any serious infection comparing TNF- $\alpha$  inhibitor users and non-users *not* matched on propensity scores, within a 90 days and 365 days risk period and according to sex and inflammatory bowel disease subtype.

**eTable 9.** Characteristics of 1) TNF- $\alpha$  inhibitor users before propensity score matching, 2) TNF- $\alpha$  inhibitor users included in the propensity score matched cohort and, 3) TNF- $\alpha$  inhibitor users excluded from the propensity score matched cohort.

**eFigure 1.** Standardised differences between TNF- $\alpha$  inhibitor users and non-users before and after matching on fixed factors and propensity scores.

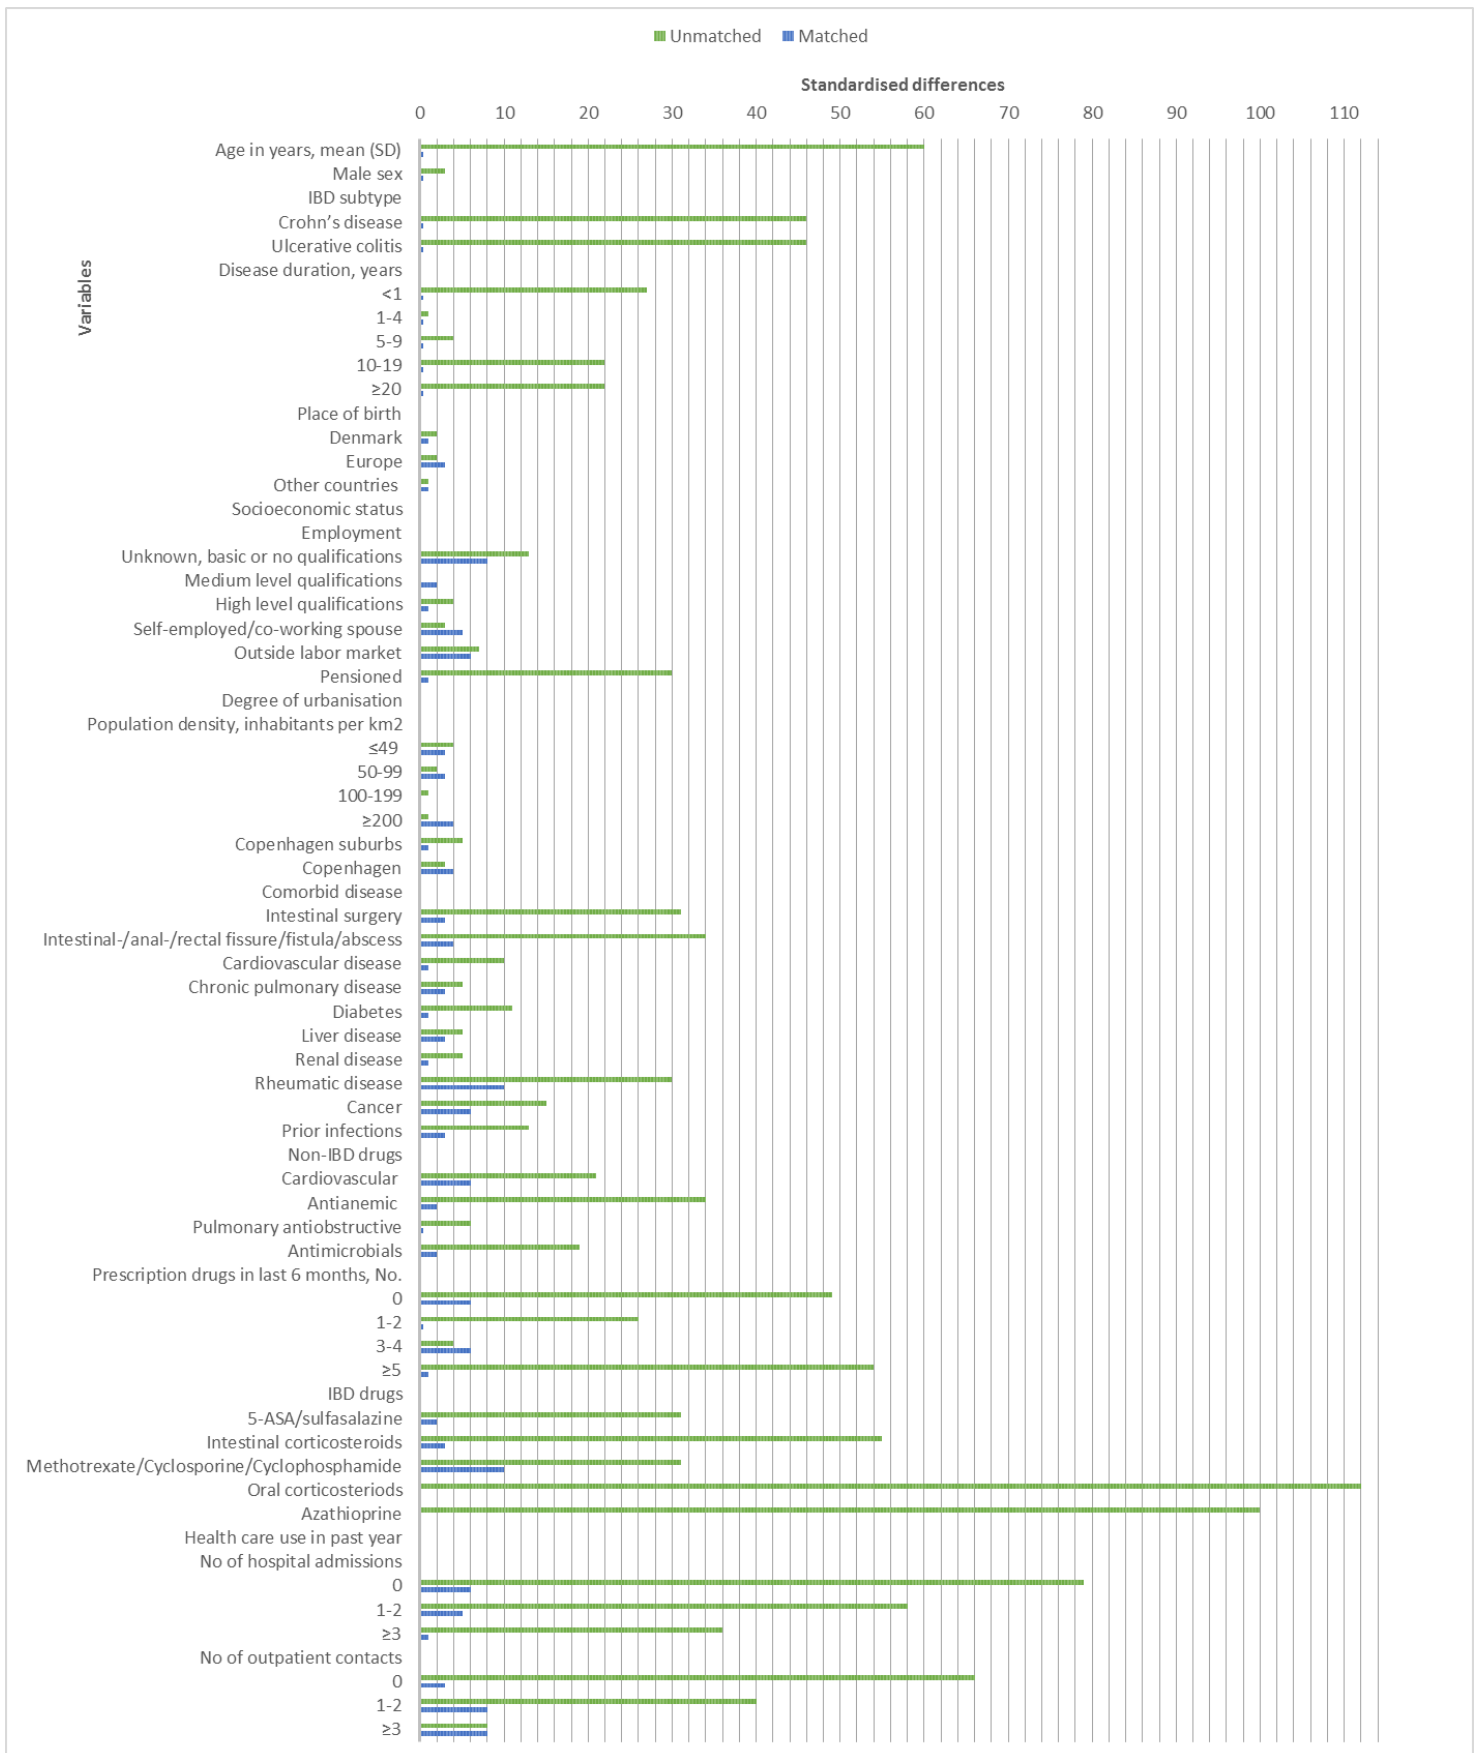

**eTable 1:** All diagnoses of infections with related ICD 10-codes included as any serious infection with the subdivision into six site-specific groups.

| Subgroup of infection                                       | Diagnoses                                                            | ICD-10                                                                                         |
|-------------------------------------------------------------|----------------------------------------------------------------------|------------------------------------------------------------------------------------------------|
| <b>Respiratory tract infections</b>                         | Mastoiditis                                                          | H70                                                                                            |
|                                                             | Nasopharyngitis                                                      | A36.1                                                                                          |
|                                                             | Sinusitis                                                            | J01.0-J01.9                                                                                    |
|                                                             | Pharyngitis                                                          | J02.0-J02.9                                                                                    |
|                                                             | Tonsillitis                                                          | A36.0; J03.0-J03.9                                                                             |
|                                                             | Laryngitis and tracheitis                                            | A36.2; J04.0-J05.9; J37.0-J37.9                                                                |
|                                                             | Acute upper respiratory infections of multiple and unspecified sites | A36.8-A36.9; J06.0-J06.9                                                                       |
|                                                             | Abscessus peritonsillaris                                            | J36.0-J36.9                                                                                    |
|                                                             | Pneumonia                                                            | A48.1; B01.2; J12.0-J18.9; J10.0                                                               |
|                                                             | Other acute lower respiratory infections                             | A37.0-A37.9; A42.0; J20.0-J22.9                                                                |
|                                                             | Abscessus pulmonis                                                   | J85                                                                                            |
| Empyema pleurae                                             | J86                                                                  |                                                                                                |
| <b>Infections of the gastrointestinal tract<sup>a</sup></b> | Intestinal infectious disease                                        | A00.0-A09.9 (but not A02.1)                                                                    |
|                                                             | Cholangitis                                                          | K830 (but not K830F and K830G)                                                                 |
|                                                             | Acute peritonitis                                                    | K650                                                                                           |
|                                                             | Hepatitis A and C                                                    | B15, B17                                                                                       |
|                                                             | Liver abscess                                                        | K750                                                                                           |
|                                                             | Abdominal actinomycosis                                              | A42.1                                                                                          |
| <b>Urological and gynecological infections</b>              | Nephritis                                                            | N10.0-N10.9                                                                                    |
|                                                             | Acute prostatitis                                                    | N410                                                                                           |
|                                                             | Cystitis                                                             | N30.0                                                                                          |
|                                                             | Salpingitis and oophoritis                                           | N70.0                                                                                          |
|                                                             | Endometritis                                                         | N71.0                                                                                          |
|                                                             | Cervicitis uteri                                                     | N72                                                                                            |
|                                                             | Syphilis                                                             | A50.0-A53.9                                                                                    |
|                                                             | Gonorrhea                                                            | A54                                                                                            |
| Chlamydia                                                   | A55.0-A56.9                                                          |                                                                                                |
| <b>Infections of the skin and subcutaneous tissue</b>       | Erysipelas                                                           | A46.0-A46.9                                                                                    |
|                                                             | Dermatophytosis and other superficial mycoses                        | B35.0-B36.9                                                                                    |
|                                                             | Cellulitis and abscess                                               | L02.0-L03.9                                                                                    |
|                                                             | Acute lymphadenitis                                                  | L04.0-L04.9                                                                                    |
|                                                             | Herpes virus                                                         | B02; B00, A60, H19.1, B01                                                                      |
|                                                             | Pilonidal cyst                                                       | L05.0-L05.9                                                                                    |
|                                                             | Other local infections of skin and subcutaneous tissue               | A36.3; L00.0-L01.0; L08.0-L08.9; L30.3                                                         |
| <b>Sepsis</b>                                               | Streptococcal                                                        | A40                                                                                            |
|                                                             | Other, including staph. aureus                                       | A41                                                                                            |
|                                                             | Listeria                                                             | A32.7                                                                                          |
|                                                             | Salmonella                                                           | A02.1                                                                                          |
|                                                             | Candida                                                              | B37.7                                                                                          |
|                                                             | Meningococcal                                                        | A39.2                                                                                          |
| <b>Other infections</b>                                     | Infection of the eye                                                 | B30; H00.0; H03.0-H03.1; H06.1; H10.0; H10.5-H10.8                                             |
|                                                             | Infections of the musculoskeletal system and connective tissue       | M00.0-M01.9; M60.0; M86.0-M86.9                                                                |
|                                                             | Infections in the nervous system                                     | G00-G01; A39.0; A32.1; A87; B00.3-4; B01.0; B02.1; B05.1; B06.0; A83; G04.0-G05.9; G02; G06    |
|                                                             | Certain bacterial disease                                            | A20.0-A29.9; A32.0-A.32.9 A.34.0-A35.9 ; A38.0; A42.2-A44.9; A48.0; A48.2-A49.9; A15-A19; A31; |
|                                                             | Spirochaetal disease                                                 | A65.0-A69.9                                                                                    |
|                                                             | Rickettsiosis                                                        | A75.0-A79.9                                                                                    |
|                                                             | Viral infections                                                     | A80.0-A99.9; B05.0-B06.9; B08.1-B09.9; B26-B27; B33.0-B34.9; B25;                              |
|                                                             | Mycoses                                                              | B37.0-B49.9; B59                                                                               |
|                                                             | Protozoal diseases                                                   | B50.0-B83.9; A07.2;                                                                            |
|                                                             | Unspecified infectious diseases                                      | B99.9                                                                                          |

<sup>a</sup>Anorectal and intestinal abscess were excluded as such a diagnosis is most probably due to IBD and not the therapy. Abbreviations: ICD, international classification of disease.

**eTable 2:** Variables included in the propensity score and variables for inflammatory bowel disease-related drugs with diagnostic, operation and ATC codes, categories, source of data and missing values.

| Variables                                              | Diagnostic ICD-10 codes, operation codes, ATC codes                                                                                        | Categories                                                                                                                                                                                                                                | Source of data                                               | % missing |
|--------------------------------------------------------|--------------------------------------------------------------------------------------------------------------------------------------------|-------------------------------------------------------------------------------------------------------------------------------------------------------------------------------------------------------------------------------------------|--------------------------------------------------------------|-----------|
| <b>Demographics</b>                                    |                                                                                                                                            |                                                                                                                                                                                                                                           |                                                              |           |
| Age                                                    |                                                                                                                                            | Five year interval                                                                                                                                                                                                                        | Danish Civil Registration System                             | 0         |
| Country of birth                                       |                                                                                                                                            | Denmark, Europe or other                                                                                                                                                                                                                  | Danish Civil Registration System                             | 0         |
| Socioeconomic status                                   |                                                                                                                                            | 1/ Employment with unknown, basic or no qualifications<br>2/ Employment with medium level qualifications<br>3/ Employment with high level qualifications<br>4/ Self-employed/co-working spouse<br>5/ Outside labor market<br>6/ Pensioned | Statistics Denmark                                           | 0.08      |
| Degree of urbanisation                                 |                                                                                                                                            | 1/ ≤ 49 inhabitants<br>2/ 50-99 inhabitants<br>3/ 100-199 inhabitants<br>4/ ≥ 200 inhabitants<br>5/ Residence in Copenhagen suburbs<br>6/ Residence in Copenhagen                                                                         | Statistics Denmark                                           | 0         |
| <b>Others</b>                                          |                                                                                                                                            |                                                                                                                                                                                                                                           |                                                              |           |
| Subtype of IBD                                         | ICD-8 codes: 56300-02, 56308-09, 56319 and 56309<br>ICD-10 code: K50, K51                                                                  | Ulcerative colitis or Crohn's disease                                                                                                                                                                                                     | National Patient Registry                                    | 0         |
| <b>Comorbid disease<sup>a</sup></b>                    |                                                                                                                                            |                                                                                                                                                                                                                                           |                                                              |           |
| Cardiovascular disease                                 | I200, I21-22, I11, I20, I24, I25, I110, I130, I132, I42, I43, I50, J81, I34-37, Q20-26, I65, I70-177, K550-551, I44-49, I26, I801-809, I81 | Yes/no                                                                                                                                                                                                                                    | National Patient Registry                                    | 0         |
| Chronic pulmonary disease                              | I27, J40-47, J60-70, J84, J92, J96, J982, J983                                                                                             | Yes/no                                                                                                                                                                                                                                    | National Patient Registry                                    | 0         |
| Renal disease                                          | I12-13, N00-08, N17-19, N25, Z49, Z940, Z992                                                                                               | Yes/no                                                                                                                                                                                                                                    | National Patient Registry                                    | 0         |
| Liver disease                                          | B18, I850, I859, I982, K70-K77                                                                                                             | Yes/no                                                                                                                                                                                                                                    | National Patient Registry                                    | 0         |
| Cancer (non-melanoma skin cancer excluded)             | C00-C43, C45-C97                                                                                                                           | Yes/no                                                                                                                                                                                                                                    | National Patient Registry                                    | 0         |
| Diabetes mellitus                                      | E10-E14 (or at least two prescriptions fills for antidiabetics, ATC code A10)                                                              | Yes/no                                                                                                                                                                                                                                    | National Patient Registry, Danish Drug Prescription Registry | 0         |
| Rheumatic disease                                      | M05-09, M30-34, M351, M353, M45                                                                                                            | Yes/no                                                                                                                                                                                                                                    | National Patient Registry                                    | 0         |
| Prior infections                                       | See eTable 1 for ICD-10 codes                                                                                                              | Yes/no                                                                                                                                                                                                                                    | National Patient Registry                                    | 0         |
| Intestinal, rectal or anal fistula, abscess or fissure | K60-K61, K63.0, K63.2                                                                                                                      | Yes/no                                                                                                                                                                                                                                    | National Patient Registry                                    | 0         |

| <b>Surgery<sup>a</sup></b>                 |                              | <b>Operation codes</b> |                                   |   |
|--------------------------------------------|------------------------------|------------------------|-----------------------------------|---|
| Intestinal surgery                         | KJH, KJE, KJF, KJG           | Yes/no                 | National Patient Registry         | 0 |
| <b>Non-IBD drugs<sup>a</sup></b>           |                              | <b>ATC-codes</b>       |                                   |   |
| Antianemic                                 | B03                          | Yes/no                 | Danish Drug Prescription Registry | 0 |
| Cardiovascular                             | C01-C10                      | Yes/no                 | Danish Drug Prescription Registry | 0 |
| Pulmonary antiobstructive                  | R03                          | Yes/no                 | Danish Drug Prescription Registry | 0 |
| Antimicrobials                             | J01, J02, J04, J05, J06      | Yes/no                 | Danish Drug Prescription Registry | 0 |
| <b>IBD drugs<sup>a</sup></b>               |                              | <b>ATC-codes</b>       |                                   |   |
| Oral corticosteroids <sup>b</sup>          | H02AB                        |                        | Danish Drug Prescription Registry | 0 |
| Azathioprine <sup>b</sup>                  | L04AX01                      |                        | Danish Drug Prescription Registry | 0 |
| 5-ASA/sulfasalazine                        | A07EC01                      |                        | Danish Drug Prescription Registry | 0 |
| Intestinal corticosteroids                 | A07EA                        |                        | Danish Drug Prescription Registry | 0 |
| Methotrexate/Cyclosporine/Cyclophosphamide | L04AX03/ L04AD01/<br>L04AA01 |                        | Danish Drug Prescription Registry | 0 |
| Prescription drugs used in last 6 months   |                              | 0,1-2,3-4, ≥5          | Danish Drug Prescription Registry | 0 |
| <b>Health status</b>                       |                              |                        |                                   |   |
| Hospital admissions in last year           |                              | 0, 1-2, ≥3             | National Patient Registry         | 0 |
| Outpatient hospital contacts in last year  |                              | 0, 1-2, ≥3             | National Patient Registry         | 0 |

ATC, anatomic therapeutic chemical; ICD, international classification of diseases;

<sup>a</sup>Registered within 1 years prior to cohort entry

<sup>b</sup>Not included in the propensity score

**eTable 3.** Characteristics of TNF- $\alpha$  inhibitor users and non-users before\* matching on propensity scores.

|                                                     | TNF- $\alpha$ inhibitor<br>users<br>(n=4 216)<br>n (%) | TNF- $\alpha$ inhibitor<br>non-users<br>(n=46 091)<br>n (%) |
|-----------------------------------------------------|--------------------------------------------------------|-------------------------------------------------------------|
| Age in years, mean (SD)                             | 39.2 (13.8)                                            | 47.9 (14.8)                                                 |
| Male sex                                            | 1820 (43)                                              | 20 609 (45)                                                 |
| <b>IBD subtype</b>                                  |                                                        |                                                             |
| Crohn's disease                                     | 2224 (53)                                              | 14 200 (31)                                                 |
| Ulcerative colitis                                  | 1992 (47)                                              | 31 891 (69)                                                 |
| <b>Disease duration, years</b>                      |                                                        |                                                             |
| <1                                                  | 1083 (26)                                              | 6856 (15)                                                   |
| 1-4                                                 | 1433 (34)                                              | 15 961 (35)                                                 |
| 5-9                                                 | 1100(26)                                               | 11 156 (24)                                                 |
| 10-19                                               | 561 (13)                                               | 10 054 (22)                                                 |
| $\geq$ 20                                           | 39 (1)                                                 | 2064 (5)                                                    |
| <b>Place of birth</b>                               |                                                        |                                                             |
| Denmark                                             | 4016 (95)                                              | 43 689 (95)                                                 |
| Europe                                              | 82 (2)                                                 | 1030 (2)                                                    |
| Other countries                                     | 118 (3)                                                | 1372 (3)                                                    |
| <b>Socioeconomic status</b>                         |                                                        |                                                             |
| Employment                                          |                                                        |                                                             |
| Unknown, basic or no qualifications                 | 1738 (41)                                              | 15 967 (35)                                                 |
| Medium level qualifications                         | 555 (13)                                               | 6059 (13)                                                   |
| High level qualifications                           | 403 ( 10)                                              | 4923(11)                                                    |
| Self-employed/co-working spouse                     | 152 (4)                                                | 1932 (4)                                                    |
| Outside labor market                                | 1190 (28)                                              | 11 528 (25)                                                 |
| Pensioned                                           | 178 (4)                                                | 5682 (12)                                                   |
| <b>Degree of urbanisation</b>                       |                                                        |                                                             |
| Population density, inhabitants per km <sup>2</sup> |                                                        |                                                             |
| $\leq$ 49                                           | 318 (8)                                                | 3059 (7)                                                    |
| 50-99                                               | 1273 (30)                                              | 13 399 (29)                                                 |
| 100-199                                             | 946 (22)                                               | 10 112 (22)                                                 |
| $\geq$ 200                                          | 468 (11)                                               | 4921 (11)                                                   |
| Copenhagen suburbs                                  | 833 (20)                                               | 10 115 (22)                                                 |
| Copenhagen                                          | 378 ( 9)                                               | 4485 (10)                                                   |
| <b>Comorbid disease<sup>a</sup></b>                 |                                                        |                                                             |
| Gastrointestinal                                    |                                                        |                                                             |
| Intestinal surgery                                  | 519 (12)                                               | 1865 (4)                                                    |
| Intestinal-/anal-/rectal fissure/fistula/abscess    | 339 (8)                                                | 515 (1)                                                     |
| Cardiovascular disease                              | 257 (6)                                                | 4541 (10)                                                   |
| Chronic pulmonary disease                           | 179 (4)                                                | 2452 (5)                                                    |
| Diabetes                                            | 208 (5)                                                | 3484 (8)                                                    |

|                                                       |           |             |
|-------------------------------------------------------|-----------|-------------|
| Liver disease                                         | 44 (1)    | 726 (2)     |
| Renal disease                                         | 27 (1)    | 512 (1)     |
| Rheumatic disease                                     | 439 (10)  | 1316 (3)    |
| Cancer                                                | 63 (2)    | 1848 (4)    |
| Prior infections <sup>b</sup>                         | 329 (8)   | 2172 (5)    |
| <b>Non-IBD drugs<sup>a</sup></b>                      |           |             |
| Cardiovascular                                        | 703 (17)  | 11 558 (25) |
| Antianemic                                            | 900 (21)  | 4178 (9)    |
| Antiobstructive pulmonary                             | 377 (9)   | 4911 (11)   |
| Antimicrobials                                        | 2101 (50) | 18 719 (41) |
| <b>No of prescription drugs used in last 6 months</b> |           |             |
| 0                                                     | 150 (4)   | 8443 (18)   |
| 1-2                                                   | 475 (11)  | 9481 (21)   |
| 3-4                                                   | 608 (14)  | 7354 (16)   |
| ≥5                                                    | 2983 (71) | 20 813 (45) |
| <b>IBD drugs<sup>a</sup></b>                          |           |             |
| 5-ASA/sulfasalazine                                   | 2021 (48) | 15 079 (33) |
| Intestinal corticosteroids                            | 1323 (31) | 4520 (10)   |
| Methotrexate/Cyclosporine/Cyclophosphamide            | 299 (7)   | 482 (1)     |
| Oral corticosteroids                                  | 2545 (60) | 6166 (13)   |
| Azathioprine                                          | 2064 (49) | 3979 (9)    |
| <b>Health care use in past year</b>                   |           |             |
| <b>No of hospital admissions</b>                      |           |             |
| 0                                                     | 1606 (38) | 34 427 (75) |
| 1-2                                                   | 1966 (47) | 9461 (21)   |
| ≥3                                                    | 644 (15)  | 2203 (5)    |
| <b>No of outpatient contacts</b>                      |           |             |
| 0                                                     | 610 (15)  | 19 741 (43) |
| 1-2                                                   | 2826 (67) | 22 059 (48) |
| ≥3                                                    | 780 (19)  | 4291 (9)    |

Abbreviations: 5-ASA, 5-aminosalicylic acid; IBD, inflammatory bowel disease; SD, standard deviation; TNF, tumour necrosis factor.

All characteristics are as current at cohort entry unless stated otherwise.

\*Not matched on propensity scores but matched on fixed factors including sex, age, disease duration and IBD subtype.

<sup>a</sup>As registered within 1 year prior cohort entry.

<sup>b</sup>Defined as prior infections associated with hospital admission within 1 year prior to cohort entry.

**eTable 4.** Characterisation of the distribution of the serious infection cases observed in TNF- $\alpha$  inhibitor users and non-users within 365 days of treatment initiation.

|                                                | Number of infections<br>in TNF- $\alpha$ inhibitor users | Number of infections<br>in TNF- $\alpha$ inhibitor non-users |
|------------------------------------------------|----------------------------------------------------------|--------------------------------------------------------------|
| <b>Skin and soft tissue infections</b>         |                                                          |                                                              |
| Abscess, furuncles, carbuncles                 | 9                                                        | 7                                                            |
| Erysipelas                                     | 5                                                        | 3                                                            |
| Herpes, including zoster                       | 3                                                        | 0                                                            |
| Pilonidal cysts                                | 1                                                        | 1                                                            |
| Acute lymphadenitis                            | 1                                                        | 1                                                            |
| Impetigo                                       | 2                                                        | 0                                                            |
| Pyoderma                                       | 1                                                        | 0                                                            |
| Pityrosporum folliculitis                      | 1                                                        | 0                                                            |
| Skin infection, unspecified                    | 3                                                        | 1                                                            |
| Total                                          | 26                                                       | 13                                                           |
| <b>Respiratory tract infections</b>            |                                                          |                                                              |
| Pneumonia                                      | 26                                                       | 24                                                           |
| Acute sinusitis                                | 1                                                        | 0                                                            |
| Acute laryngitis                               | 1                                                        | 0                                                            |
| Pharyngitis/tonsillitis                        | 0                                                        | 1                                                            |
| Upper/lower respiratory tract infections       | 1                                                        | 2                                                            |
| Peritonsillar abscess                          | 1                                                        | 1                                                            |
| Total                                          | 30                                                       | 28                                                           |
| <b>Gastrointestinal infections</b>             |                                                          |                                                              |
| Clostridium difficile                          | 4                                                        | 2                                                            |
| Gastroenteritis, unspecified                   | 18                                                       | 13                                                           |
| Peritonitis                                    | 3                                                        | 1                                                            |
| Salmonella enteritis                           | 1                                                        | 2                                                            |
| Cholangitis                                    | 2                                                        | 3                                                            |
| Abdominal abscess                              | 0                                                        | 1                                                            |
| Viral enteritis                                | 0                                                        | 1                                                            |
| Alimentary infection                           | 0                                                        | 1                                                            |
| Total                                          | 28                                                       | 24                                                           |
| <b>Sepsis</b>                                  |                                                          |                                                              |
| Sepsis caused by staphylococcus                | 3                                                        | 0                                                            |
| Sepsis, unspecified                            | 3                                                        | 4                                                            |
| Total                                          | 6                                                        | 4                                                            |
| <b>Urological and gynecological infections</b> |                                                          |                                                              |
| Acute cystitis                                 | 6                                                        | 3                                                            |
| Endometritis                                   | 0                                                        | 1                                                            |
| Salpingo-oophoritis                            | 2                                                        | 0                                                            |
| Acute prostatitis                              | 1                                                        | 0                                                            |
| Total                                          | 9                                                        | 4                                                            |
| <b>Other infections</b>                        |                                                          |                                                              |
| Infection, unspecified                         | 0                                                        | 1                                                            |
| Cytomegalovirus                                | 1                                                        | 0                                                            |
| Candida infection                              | 3                                                        | 2                                                            |
| Purulent arthritis                             | 1                                                        | 0                                                            |
| Eye infections                                 | 2                                                        | 1                                                            |
| Viral infections, unspecified                  | 0                                                        | 1                                                            |
| Listeria meningitis                            | 1                                                        | 0                                                            |
| Total                                          | 8                                                        | 5                                                            |
| <b>Total</b>                                   | <b>107</b>                                               | <b>78</b>                                                    |

Abbreviations: TNF, tumour necrosis factor



**eTable 5.** Characteristics of cohort patients with inflammatory bowel disease treated with TNF- $\alpha$  inhibitors and azathioprine as monotherapy, before\* and after matching on propensity scores.

|                                                     | Before propensity score matching             |                                   | After propensity score matching             |                                  |
|-----------------------------------------------------|----------------------------------------------|-----------------------------------|---------------------------------------------|----------------------------------|
|                                                     | TNF- $\alpha$ inhibitor users (n=1211) n (%) | Azathioprine users (n=5545) n (%) | TNF- $\alpha$ inhibitor users (n=268) n (%) | Azathioprine users (n=268) n (%) |
| Age in years, mean (SD)                             | 40.0 (14.1)                                  | 38.6 (14.7)                       | 33.5 (12.1)                                 | 33.6 (12.2)                      |
| Male sex                                            | 520 (43)                                     | 2441 (44)                         | 116 (43)                                    | 116 (43)                         |
| <b>IBD subtype</b>                                  |                                              |                                   |                                             |                                  |
| Crohn's disease                                     | 508 (42)                                     | 2566 (46)                         | 144 (54)                                    | 144 (54)                         |
| Ulcerative colitis                                  | 703 (58)                                     | 2979 (54)                         | 124 (46)                                    | 124 (46)                         |
| <b>Disease duration, years</b>                      |                                              |                                   |                                             |                                  |
| <1                                                  | 499 (41)                                     | 2709 (49)                         | 154 (58)                                    | 153 (57)                         |
| 1-4                                                 | 285 (24)                                     | 1528 (28)                         | 69 (26)                                     | 71 (27)                          |
| 5-9                                                 | 197 (16)                                     | 763 (14)                          | 20 (8)                                      | 19 (7)                           |
| 10-19                                               | 213 (18)                                     | 515 (9)                           | 25 (9)                                      | 25 (9)                           |
| $\geq$ 20                                           | 17 (1)                                       | 30 (1)                            | 0                                           | 0                                |
| <b>Place of birth</b>                               |                                              |                                   |                                             |                                  |
| Denmark                                             | 1155 (95)                                    | 5274 (95)                         | 263 (98)                                    | 257 (96)                         |
| Europe                                              | 23 (2)                                       | 107 (2)                           | 2 (1)                                       | 3 (1)                            |
| Other countries                                     | 33 (3)                                       | 164 (3)                           | 3 (1)                                       | 8 (3)                            |
| <b>Socioeconomic status</b>                         |                                              |                                   |                                             |                                  |
| Employment                                          |                                              |                                   |                                             |                                  |
| Unknown, basic or no qualifications                 | 457 (38)                                     | 2409 (43)                         | 119 (44)                                    | 122 (46)                         |
| Medium level qualifications                         | 160 (13)                                     | 692 (13)                          | 40 (15)                                     | 34 (13)                          |
| High level qualifications                           | 130 (11)                                     | 505 (9)                           | 21 (8)                                      | 23 (9)                           |
| Self-employed/co-working spouse                     | 38 (3)                                       | 192 (4)                           | 8 (3)                                       | 8 (3)                            |
| Outside labor market                                | 364 (30)                                     | 1503 (27)                         | 78 (29)                                     | 77 (29)                          |
| Pensioned                                           | 62 (5)                                       | 244 (4)                           | 2 (1)                                       | 4 (2)                            |
| <b>Degree of urbanisation</b>                       |                                              |                                   |                                             |                                  |
| Population density, inhabitants per km <sup>2</sup> |                                              |                                   |                                             |                                  |
| $\leq$ 49                                           | 86 (7)                                       | 380 (7)                           | 23 (9)                                      | 20 (8)                           |
| 50-99                                               | 347 (29)                                     | 1664 (30)                         | 83 (31)                                     | 86 (32)                          |
| 100-199                                             | 265 (22)                                     | 1258 (23)                         | 68 (25)                                     | 60 (22)                          |
| $\geq$ 200                                          | 165 (14)                                     | 516 (9)                           | 23 (9)                                      | 24 (9)                           |
| Copenhagen suburbs                                  | 236 (20)                                     | 1244 (22)                         | 47 (18)                                     | 62 (23)                          |
| Copenhagen                                          | 112 (9)                                      | 483 (9)                           | 24 (9)                                      | 16 (6)                           |
| <b>Comorbid disease<sup>a</sup></b>                 |                                              |                                   |                                             |                                  |
| Gastrointestinal                                    |                                              |                                   |                                             |                                  |
| Intestinal surgery                                  | 132 (11)                                     | 551 (10)                          | 30 (11)                                     | 25 (9)                           |
| Intestinal-/anal-/rectal fissure/fistula/abscess    | 96 (8)                                       | 255 (5)                           | 29 (11)                                     | 14 (5)                           |
| Cardiovascular disease                              | 83 (7)                                       | 318 (6)                           | 13 (5)                                      | 112 (5)                          |

|                                               |          |           |          |          |
|-----------------------------------------------|----------|-----------|----------|----------|
| Chronic pulmonary disease                     | 49 (4)   | 214 (4)   | 5 (2)    | 11 (4)   |
| Diabetes                                      | 78 (6)   | 274 (5)   | 9 (3)    | 12 (5)   |
| Renal disease                                 | 10 (1)   | 37 (1)    | 1 (<1)   | 1 (<1)   |
| Liver disease                                 | 9 (1)    | 63 (1)    | 2 (1)    | 3 (1)    |
| Rheumatic disease                             | 216 (18) | 173 (3)   | 8 (3)    | 10 (4)   |
| Cancer                                        | 26 (2)   | 84 (2)    | 1 (<1)   | 1 (<1)   |
| Prior infections <sup>b</sup>                 | 108 (9)  | 466 (8)   | 24 (9)   | 26 (10)  |
| <b>Non-IBD drugs<sup>a</sup></b>              |          |           |          |          |
| Cardiovascular                                | 185 (15) | 886 (16)  | 24 (9)   | 21 (8)   |
| Antianemic                                    | 210 (17) | 670 (12)  | 35 (13)  | 47 (18)  |
| Pulmonary antiobstructive                     | 104 (9)  | 556 (10)  | 14 (5)   | 25 (9)   |
| Antimicrobials                                | 598 (49) | 2470 (45) | 118 (44) | 123 (46) |
| Prescription drugs used in last 6 months, No. |          |           |          |          |
| 0                                             | 68 (6)   | 3829 (69) | 59 (22)  | 59 (22)  |
| 1-2                                           | 163 (14) | 168 (3)   | 18 (7)   | 21 (8)   |
| 3-4                                           | 192 (16) | 247 (5)   | 36 (13)  | 36 (13)  |
| ≥5                                            | 788 (65) | 1301 (24) | 155 (58) | 152 (57) |
| <b>IBD drugs<sup>a</sup></b>                  |          |           |          |          |
| 5-ASA/sulfasalazine                           | 632 (52) | 3514 (63) | 132 (49) | 151 (56) |
| Intestinal corticosteroids                    | 332 (27) | 2159 (39) | 85 (32)  | 89 (33)  |
| Methotrexate/Cyclosporine/Cyclophosphamide    | 105 (9)  | 40 (1)    | 3 (1)    | 2 (1)    |
| Oral corticosteroids                          | 606 (50) | 3794 (68) | 138 (52) | 199 (74) |
| <b>Health care use in past year</b>           |          |           |          |          |
| No of hospital admissions                     |          |           |          |          |
| 0                                             | 397 (33) | 2209 (40) | 75 (28)  | 91 (34)  |
| 1-2                                           | 647 (53) | 2721 (49) | 156 (58) | 141 (53) |
| ≥3                                            | 167 (14) | 615 (11)  | 37 (14)  | 36 (13)  |
| No of outpatient contacts                     |          |           |          |          |
| 0                                             | 159 (13) | 931 (17)  | 34 (13)  | 35 (13)  |
| 1-2                                           | 803 (66) | 3765 (68) | 180 (67) | 187 (70) |
| ≥3                                            | 249 (21) | 849 (15)  | 54 (20)  | 46 (17)  |

Abbreviations: 5-ASA, 5-aminosalicylic acid; IBD, inflammatory bowel disease; SD, standard deviation; TNF, tumour necrosis factor.

All characteristics are as current at cohort entry unless stated otherwise.

\*Not matched on propensity scores but matched on fixed factors including sex, age, disease duration and IBD subtype.

<sup>a</sup>As registered within 1 year prior cohort entry.

<sup>b</sup>Defined as prior infections associated with hospital admission within 1 year prior to cohort entry.

**eTable 6:** Array approach testing the impact of unmeasured confounding

| ARR  | RR <sub>CD</sub> | P <sub>C1</sub> | P <sub>C0</sub> | RR <sub>adjusted</sub> | % Bias |
|------|------------------|-----------------|-----------------|------------------------|--------|
| 1,63 | 5,5              | 0,1             | 0,2             | 2,14                   | -23,68 |
| 1,63 | 5,0              | 0,1             | 0,2             | 2,10                   | -22,22 |
| 1,63 | 4,5              | 0,1             | 0,2             | 2,05                   | -20,59 |
| 1,63 | 4,0              | 0,1             | 0,2             | 2,01                   | -18,75 |
| 1,63 | 3,5              | 0,1             | 0,2             | 1,96                   | -16,67 |
| 1,63 | 3,0              | 0,1             | 0,2             | 1,90                   | -14,29 |
| 1,63 | 2,5              | 0,1             | 0,2             | 1,84                   | -11,54 |
| 1,63 | 2,0              | 0,1             | 0,2             | 1,78                   | -8,33  |
| 1,63 | 1,5              | 0,1             | 0,2             | 1,71                   | -4,55  |
| 1,63 | 1,0              | 0,1             | 0,2             | 1,63                   | 0,00   |
| 1,63 | 5,5              | 0,2             | 0,2             | 1,63                   | 0,00   |
| 1,63 | 5,0              | 0,2             | 0,2             | 1,63                   | 0,00   |
| 1,63 | 4,5              | 0,2             | 0,2             | 1,63                   | 0,00   |
| 1,63 | 4,0              | 0,2             | 0,2             | 1,63                   | 0,00   |
| 1,63 | 3,5              | 0,2             | 0,2             | 1,63                   | 0,00   |
| 1,63 | 3,0              | 0,2             | 0,2             | 1,63                   | 0,00   |
| 1,63 | 2,5              | 0,2             | 0,2             | 1,63                   | 0,00   |
| 1,63 | 2,0              | 0,2             | 0,2             | 1,63                   | 0,00   |
| 1,63 | 1,5              | 0,2             | 0,2             | 1,63                   | 0,00   |
| 1,63 | 1,0              | 0,2             | 0,2             | 1,63                   | 0,00   |
| 1,63 | 5,5              | 0,3             | 0,2             | 1,32                   | 23,68  |
| 1,63 | 5,0              | 0,3             | 0,2             | 1,33                   | 22,22  |
| 1,63 | 4,5              | 0,3             | 0,2             | 1,35                   | 20,59  |
| 1,63 | 4,0              | 0,3             | 0,2             | 1,37                   | 18,75  |
| 1,63 | 3,5              | 0,3             | 0,2             | 1,40                   | 16,67  |
| 1,63 | 3,0              | 0,3             | 0,2             | 1,43                   | 14,29  |
| 1,63 | 2,5              | 0,3             | 0,2             | 1,46                   | 11,54  |
| 1,63 | 2,0              | 0,3             | 0,2             | 1,50                   | 8,33   |
| 1,63 | 1,5              | 0,3             | 0,2             | 1,56                   | 4,55   |
| 1,63 | 1,0              | 0,3             | 0,2             | 1,63                   | 0,00   |
| 1,63 | 5,5              | 0,4             | 0,2             | 1,11                   | 47,37  |
| 1,63 | 5,0              | 0,4             | 0,2             | 1,13                   | 44,44  |
| 1,63 | 4,5              | 0,4             | 0,2             | 1,15                   | 41,18  |
| 1,63 | 4,0              | 0,4             | 0,2             | 1,19                   | 37,50  |
| 1,63 | 3,5              | 0,4             | 0,2             | 1,22                   | 33,33  |
| 1,63 | 3,0              | 0,4             | 0,2             | 1,27                   | 28,57  |
| 1,63 | 2,5              | 0,4             | 0,2             | 1,32                   | 23,08  |
| 1,63 | 2,0              | 0,4             | 0,2             | 1,40                   | 16,67  |
| 1,63 | 1,5              | 0,4             | 0,2             | 1,49                   | 9,09   |
| 1,63 | 1,0              | 0,4             | 0,2             | 1,63                   | 0,00   |
| 1,63 | 5,5              | 0,5             | 0,2             | 0,95                   | 71,05  |
| 1,63 | 5,0              | 0,5             | 0,2             | 0,98                   | 66,67  |
| 1,63 | 4,5              | 0,5             | 0,2             | 1,01                   | 61,76  |
| 1,63 | 4,0              | 0,5             | 0,2             | 1,04                   | 56,25  |
| 1,63 | 3,5              | 0,5             | 0,2             | 1,09                   | 50,00  |
| 1,63 | 3,0              | 0,5             | 0,2             | 1,14                   | 42,86  |
| 1,63 | 2,5              | 0,5             | 0,2             | 1,21                   | 34,62  |
| 1,63 | 2,0              | 0,5             | 0,2             | 1,30                   | 25,00  |
| 1,63 | 1,5              | 0,5             | 0,2             | 1,43                   | 13,64  |
| 1,63 | 1,0              | 0,5             | 0,2             | 1,63                   | 0,00   |
| 1,63 | 5,5              | 0,6             | 0,2             | 0,84                   | 94,74  |
| 1,63 | 5,0              | 0,6             | 0,2             | 0,86                   | 88,89  |
| 1,63 | 4,5              | 0,6             | 0,2             | 0,89                   | 82,35  |
| 1,63 | 4,0              | 0,6             | 0,2             | 0,93                   | 75,00  |
| 1,63 | 3,5              | 0,6             | 0,2             | 0,98                   | 66,67  |
| 1,63 | 3,0              | 0,6             | 0,2             | 1,04                   | 57,14  |
| 1,63 | 2,5              | 0,6             | 0,2             | 1,12                   | 46,15  |
| 1,63 | 2,0              | 0,6             | 0,2             | 1,22                   | 33,33  |
| 1,63 | 1,5              | 0,6             | 0,2             | 1,38                   | 18,18  |
| 1,63 | 1,0              | 0,6             | 0,2             | 1,63                   | 0,00   |
| 1,63 | 5,5              | 0,7             | 0,2             | 0,75                   | 118,42 |
| 1,63 | 5,0              | 0,7             | 0,2             | 0,77                   | 111,11 |
| 1,63 | 4,5              | 0,7             | 0,2             | 0,80                   | 102,94 |
| 1,63 | 4,0              | 0,7             | 0,2             | 0,84                   | 93,75  |
| 1,63 | 3,5              | 0,7             | 0,2             | 0,89                   | 83,33  |
| 1,63 | 3,0              | 0,7             | 0,2             | 0,95                   | 71,43  |
| 1,63 | 2,5              | 0,7             | 0,2             | 1,03                   | 57,69  |
| 1,63 | 2,0              | 0,7             | 0,2             | 1,15                   | 41,67  |
| 1,63 | 1,5              | 0,7             | 0,2             | 1,33                   | 22,73  |
| 1,63 | 1,0              | 0,7             | 0,2             | 1,63                   | 0,00   |

$$\% \text{ Bias} = [(ARR - RR_{adj.}) / RR_{adj.}] * 100$$

$$RR_{adj.} = \frac{ARR}{\frac{P_{C1}(RR_{CD} - 1) + 1}{P_{C0}(RR_{CD} - 1) + 1}}$$

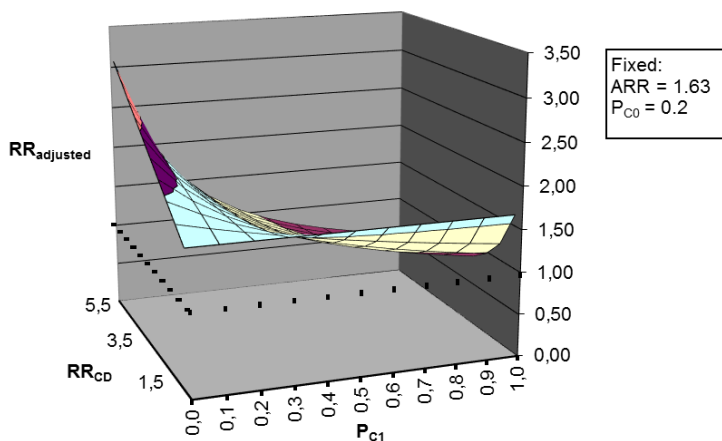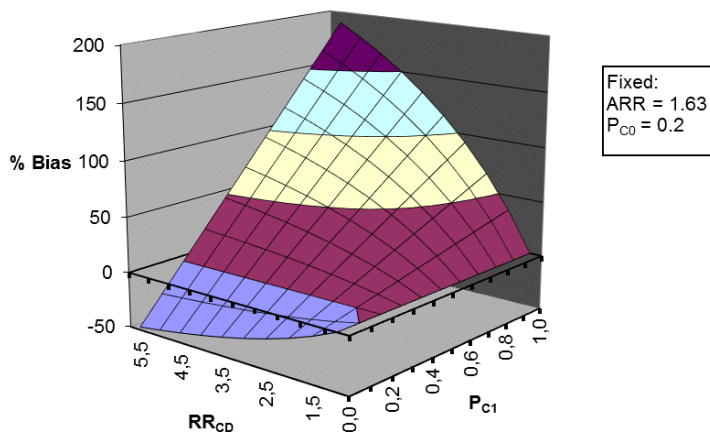

- RR "True" or fully adjusted exposure relative risk
- ARR Apparent (or observed) exposure relative risk
- RR<sub>CD</sub> Association between confounder and disease outcome
- P<sub>C1</sub> Prevalence of confounder in the exposed
- P<sub>C0</sub> Prevalence of confounder in the unexposed

**Reference:**  
*Schneeweiss S. Sensitivity analysis and external adjustment for unmeasured confounders in epidemiologic database studies of therapeutics. Pharmacoepidemiol Drug Safety, 2006;15:291-303.*

**eTable 7.** Hazard ratios for any serious infection comparing current and past TNF- $\alpha$  inhibitor users with non-users based on a propensity score matched sub-cohort<sup>a</sup>.

| Risk periods    | TNF- $\alpha$ inhibitor non-users | TNF- $\alpha$ inhibitor users |                     |
|-----------------|-----------------------------------|-------------------------------|---------------------|
|                 |                                   | Current                       | past                |
| <b>90 days</b>  |                                   |                               |                     |
| Patients, No    | 1457 <sup>b</sup>                 | 1457 <sup>b</sup>             | 345                 |
| Events, No      | 74                                | 46                            | 0                   |
| HR (95% CI)     | 1 (Reference)                     | 1.70 (1.03 to 2.81)           | n/a                 |
| <b>365 days</b> |                                   |                               |                     |
| Patients, No    | 1472                              | 1472                          | 980                 |
| Events, No      | 74                                | 74                            | 26                  |
| HR (95% CI)     | 1 (Reference)                     | 1.29 (0.90 to 1.85)           | 1.20 (0.74 to 1.95) |

Abbreviations: HR, hazard ratio; n/a, not applicable; TNF, tumour necrosis factor.

<sup>a</sup>The sub-cohort included 1472 TNF- $\alpha$  inhibitor users and 1472 non-users and was based on data on drug exposure from the National Patient Registry restricted to a study period from 2005 to 2012.

<sup>b</sup>In a minority of patients, data on specific TNF- $\alpha$  inhibitors was not available for the first dose(s). These patients could enter the analysis later during follow-up. Hence, the number of patients included in the 365-day risk period is larger than the number in the 90-day risk period.

**eTable 8:** Hazard ratios for any serious infection comparing TNF- $\alpha$  inhibitor users and non-users *not* matched on propensity scores, within a 90 days and 365 days risk period and according to sex and inflammatory bowel disease subtype.

| Risk periods       | TNF- $\alpha$ inhibitor users |        | TNF- $\alpha$ inhibitor non-users |        | HR (95% CI)         |
|--------------------|-------------------------------|--------|-----------------------------------|--------|---------------------|
|                    | Patients                      | Events | Patients                          | Events |                     |
| <b>90 days</b>     |                               |        |                                   |        |                     |
| Main analysis      | 4216                          | 132    | 46 091                            | 602    | 2.38 (1.97 to 2.88) |
| Sex                |                               |        |                                   |        |                     |
| Men                | 1820                          | 51     | 20 609                            | 283    | 2.02 (1.50 to 2.73) |
| Women              | 2396                          | 81     | 25 482                            | 319    | 2.69 (2.11 to 3.43) |
| IBD subtype        |                               |        |                                   |        |                     |
| Ulcerative colitis | 1992                          | 71     | 31 891                            | 363    | 3.12 (2.42 to 4.02) |
| Crohn's disease    | 2224                          | 61     | 14 200                            | 239    | 1.62 (1.22 to 2.15) |
| <b>365 days</b>    |                               |        |                                   |        |                     |
| Main analysis      | 4216                          | 325    | 46 091                            | 1732   | 1.99 (1.77 to 2.24) |
| Sex                |                               |        |                                   |        |                     |
| Men                | 1820                          | 122    | 20 609                            | 758    | 1.78 (1.47 to 2.15) |
| Women              | 2396                          | 203    | 25 482                            | 974    | 2.14 (1.84 to 2.49) |
| IBD subtype        |                               |        |                                   |        |                     |
| Ulcerative colitis | 1992                          | 168    | 31 891                            | 1067   | 2.46 (2.09 to 2.89) |
| Crohn's disease    | 2224                          | 157    | 14 200                            | 665    | 1.47 (1.24 to 1.75) |

TNF- $\alpha$  inhibitor users and non-users were matched on fixed factors (age, sex, IBD subtype and disease duration).

Abbreviations: HR, hazard ratio; IBD, inflammatory bowel disease; TNF, tumour necrosis factor

**eTable 9.** Characteristics of 1) TNF- $\alpha$  inhibitor users before propensity score matching, 2) TNF- $\alpha$  inhibitor users included in the propensity score matched cohort and, 3) TNF- $\alpha$  inhibitor users excluded from the propensity score matched cohort.

|                                                     | All TNF- $\alpha$<br>inhibitor users<br>(n=4 216)<br>n (%) | TNF- $\alpha$ inhibitor<br>users<br>included (n=1 543)<br>n (%) | TNF- $\alpha$ inhibitor<br>users<br>excluded (n=2 673)<br>n (%) |
|-----------------------------------------------------|------------------------------------------------------------|-----------------------------------------------------------------|-----------------------------------------------------------------|
| Age in years, mean (SD)                             | 39.2 (13.8)                                                | 44.6 (14.5)                                                     | 36.2 (12.4)                                                     |
| <b>Sex</b>                                          |                                                            |                                                                 |                                                                 |
| Males                                               | 1820 (43)                                                  | 665 (43)                                                        | 1164 (44)                                                       |
| <b>IBD subtype</b>                                  |                                                            |                                                                 |                                                                 |
| Crohn's disease                                     | 2224 (53)                                                  | 667 (43)                                                        | 1557 (58)                                                       |
| Ulcerative colitis                                  | 1992 (47)                                                  | 876 (57)                                                        | 1116 (42)                                                       |
| <b>Disease duration, years</b>                      |                                                            |                                                                 |                                                                 |
| <1                                                  | 1083 (26)                                                  | 392 (25)                                                        | 691 (26)                                                        |
| 1-4                                                 | 1433 (34)                                                  | 530 (34)                                                        | 903 (34)                                                        |
| 5-9                                                 | 1100(26)                                                   | 360 (23)                                                        | 740 (28)                                                        |
| 10-19                                               | 561 (13)                                                   | 238 (15)                                                        | 323 (12)                                                        |
| $\geq$ 20                                           | 39 (1)                                                     | 23 (2)                                                          | 16 (1)                                                          |
| <b>Place of birth</b>                               |                                                            |                                                                 |                                                                 |
| Denmark                                             | 4016 (95)                                                  | 1473 (95)                                                       | 2543 (95)                                                       |
| Europe                                              | 82 (2)                                                     | 32 (2)                                                          | 50 (2)                                                          |
| Other countries                                     | 118 (3)                                                    | 38 (3)                                                          | 80 (3)                                                          |
| <b>Socioeconomic status</b>                         |                                                            |                                                                 |                                                                 |
| Employment                                          |                                                            |                                                                 |                                                                 |
| Unknown, basic or no qualifications                 | 1738 (41)                                                  | 560 (36)                                                        | 1178 (44)                                                       |
| Medium level qualifications                         | 555 (13)                                                   | 212 (14)                                                        | 343 (13)                                                        |
| High level qualifications                           | 403 ( 10)                                                  | 146 ( 10)                                                       | 257 (10)                                                        |
| Self-employed/co-working spouse                     | 152 (4)                                                    | 68 (4)                                                          | 84 (3)                                                          |
| Outside labor market                                | 1190 (28)                                                  | 424 (28)                                                        | 766 (29)                                                        |
| Pensioned                                           | 178 (4)                                                    | 133 (9)                                                         | 45 (2)                                                          |
| <b>Degree of urbanisation</b>                       |                                                            |                                                                 |                                                                 |
| Population density, inhabitants per km <sup>2</sup> |                                                            |                                                                 |                                                                 |
| $\leq$ 49                                           | 318 (8)                                                    | 106 (7)                                                         | 212 (8)                                                         |
| 50-99                                               | 1273 (30)                                                  | 465 (30)                                                        | 808 (30)                                                        |
| 100-199                                             | 946 (22)                                                   | 341 (22)                                                        | 605 (23)                                                        |
| $\geq$ 200                                          | 468 (11)                                                   | 160 (10)                                                        | 308 (12)                                                        |
| Copenhagen suburbs                                  | 833 (20)                                                   | 306 (20)                                                        | 527 (20)                                                        |
| Copenhagen                                          | 378 ( 9)                                                   | 165 (11)                                                        | 213 (8)                                                         |
| <b>Comorbidities<sup>a</sup></b>                    |                                                            |                                                                 |                                                                 |
| Gastrointestinal                                    |                                                            |                                                                 |                                                                 |
| Intestinal surgery                                  | 519 (12)                                                   | 115 (8)                                                         | 404 (15)                                                        |
| Intestinal-/anal-/rectal fissure/fistula/abscess    | 339 (8)                                                    | 34 (2)                                                          | 305 (11)                                                        |
| Rheumatic disease                                   | 439 (10)                                                   | 101 (7)                                                         | 338 (13)                                                        |

|                                                |           |          |           |
|------------------------------------------------|-----------|----------|-----------|
| Cardiovascular disease                         | 257 (6)   | 135 (9)  | 122 (5)   |
| Chronic pulmonary disease                      | 179 (4)   | 86 (6)   | 93 (4)    |
| Diabetes                                       | 208 (5)   | 104 (7)  | 104 (4)   |
| Liver disease                                  | 44 (1)    | 23 (2)   | 21 (1)    |
| Renal disease                                  | 27 (1)    | 16 (1)   | 11 (<1)   |
| Cancer                                         | 63 (2)    | 50 (3)   | 13 (1)    |
| Prior infections <sup>b</sup>                  | 329 (8)   | 117 (8)  | 212 (8)   |
| <b>Non-IBD drugs<sup>a</sup></b>               |           |          |           |
| Cardiovascular                                 | 703 (17)  | 347 (23) | 356 (13)  |
| Antianemic                                     | 900 (21)  | 231 (15) | 669 (25)  |
| Pulmonary antiobstructive                      | 377 (9)   | 173 (11) | 204 (8)   |
| Antimicrobials                                 | 2101 (50) | 722 (47) | 1379 (52) |
| No of prescription drugs used in last 6 months |           |          |           |
| 0                                              | 150 (4)   | 110 (7)  | 4 (2)     |
| 1-2                                            | 475 (11)  | 257 (17) | 218 (8)   |
| 3-4                                            | 608 (14)  | 244 (16) | 364 (14)  |
| 5+                                             | 2983 (71) | 932 (60) | 2051 (77) |
| <b>IBD drugs<sup>a</sup></b>                   |           |          |           |
| 5-ASA/sulfasalazine                            | 2021 (48) | 670 (43) | 1351 (51) |
| Intestinal corticosteroids                     | 1323 (31) | 283 (18) | 1040 (39) |
| Methotrexate/Cyclosporine/Cyclophosphamide     | 299 (7)   | 42 (3)   | 257 (10)  |
| <b>Health care use in past year</b>            |           |          |           |
| No of hospital admissions                      |           |          |           |
| 0                                              | 1606 (38) | 872 (57) | 734 (28)  |
| 1-2                                            | 1966 (47) | 539 (35) | 1427 (53) |
| 3+                                             | 644 (15)  | 132 (9)  | 512 (19)  |
| No of outpatient contacts                      |           |          |           |
| 0                                              | 610 (15)  | 371 (24) | 239 (9)   |
| 1-2                                            | 2826 (67) | 944 (61) | 1882 (70) |
| 3+                                             | 780 (19)  | 228 (15) | 552 (21)  |

Abbreviations: 5-ASA, 5-aminosalicylic acid; IBD, inflammatory bowel disease; SD, standard deviation; TNF, tumour necrosis factor.

All characteristics are as current at cohort entry unless stated otherwise.

<sup>a</sup>As registered within 1 year prior cohort entry.

<sup>b</sup>Defined as prior infections associated with hospital admission within 1 year prior to cohort entry.
